# Supplementary material for: SUSTAIN drilling at Surtsey volcano, Iceland, tracks hydrothermal and microbiological interactions in basalt 50 years after eruption
Source: Copernicus journal article supplement (doi:10.5194/sd-25-35-2019), 2019-06-12
Supplement: Supplementary file 1 [file sd-25-35-2019-supplement.pdf]

Supplement of Sci. Dril., 25, 35–46, 2019  
<https://doi.org/10.5194/sd-25-35-2019-supplement>  
© Author(s) 2019. This work is distributed under  
the Creative Commons Attribution 4.0 License.

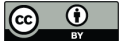

*Supplement of*

**SUSTAIN drilling at Surtsey volcano, Iceland, tracks hydrothermal and  
microbiological interactions in basalt 50 years after eruption**

**Marie D. Jackson et al.**

*Correspondence to:* Marie D. Jackson ([m.d.jackson@utah.edu](mailto:m.d.jackson@utah.edu))

The copyright of individual parts of the supplement might differ from the CC BY 4.0 License.

**Table S1. Density and water absorption measurements, SE-02b and SE-03 samples and reference samples.**

| Reference Number                      | Specimen ID            | Specimen Length (cm) | Approximate Vertical Depth (m) | Dry Density (g/cm <sup>3</sup> ) | Wet Density (g/cm <sup>3</sup> ) | Water Absorption |
|---------------------------------------|------------------------|----------------------|--------------------------------|----------------------------------|----------------------------------|------------------|
| <i>SE-02B (Hole C)</i>                |                        |                      |                                |                                  |                                  |                  |
| RS-1                                  | 5059-1-C-4-2, 53-85    | 32                   | 22.66                          | 1.64                             | 1.96                             | 0.16             |
| RS-2                                  | 5059-1-C-9-2, 58-88    | 30                   | 34.56                          | 1.54                             | 1.86                             | 0.17             |
| RS-3                                  | 5059-1-C-13-2, 39-69   | 30                   | 44.44                          | 1.62                             | 1.9                              | 0.15             |
| RS-4                                  | 5059-1-C-17-2, 68-98   | 30                   | 55.72                          | 1.59                             | 1.88                             | 0.15             |
| RS-5                                  | 5059-1-C-22-2, 57-87   | 30                   | 65.11                          | 1.67                             | 1.94                             | 0.14             |
| RS-6                                  | 5059-1-C-27-3, 51-81   | 30                   | 77.93                          | 1.71                             | 2.02                             | 0.15             |
| RS-7                                  | 5059-1-C-30-2, 38-68   | 30                   | 86.20                          | 1.85                             | 2.11                             | 0.12             |
| RS-8                                  | 5059-1-C-33-2, 61-91   | 30                   | 92.34                          | 1.55                             | 1.89                             | 0.18             |
| RS-9                                  | 5059-1-C-36-2, 44-74   | 30                   | 100.84                         | 1.49                             | 1.83                             | 0.18             |
| RS-10                                 | 5059-1-C-39-2, 68-98   | 30                   | 110.71                         | 1.88                             | 2.14                             | 0.12             |
| RS-11                                 | 5059-1-C-42-3, 35-65   | 30                   | 120.33                         | 1.75                             | 2                                | 0.13             |
| RS-12                                 | 5059-1-C-45-1, 38-68   | 30                   | 127.83                         | 1.73                             | 2.06                             | 0.16             |
| RS-13                                 | 5059-1-C-49-3, 18-48   | 30                   | 138.17                         | 1.67                             | 2.03                             | 0.18             |
| RS-14                                 | 5059-1-C-52-3, 60-89   | 29                   | 148.44                         | 1.94                             | 2.13                             | 0.09             |
| RS-15                                 | 5059-1-C-55-3, 30-58   | 28                   | 157.01                         | 1.80                             | 2.07                             | 0.13             |
| RS-16                                 | 5059-1-C-59-2, 35-65   | 30                   | 165.40                         | 1.78                             | 2.07                             | 0.14             |
| RS-17                                 | 5059-1-C-62-3, 60-93   | 33                   | 175.98                         | 1.93                             | 2.18                             | 0.12             |
| RS-18                                 | 5059-1-C-65-2, 32-64   | 32                   | 180.65                         | 1.22                             | 1.43                             | 0.14             |
| <i>SE-03 (Hole D)</i>                 |                        |                      |                                |                                  |                                  |                  |
| RS-19                                 | 5059-1-D-73-3, 34-68   | 34                   | 180.47                         | 2.08                             | 2.27                             | 0.09             |
| RS-20                                 | 5059-1-D-74-2, 30-67   | 37                   | 181.07                         | 2.06                             | 2.26                             | 0.10             |
| RS-21                                 | 5059-1-D-76-3, 20-55   | 35                   | 187.49                         | 2.13                             | 2.35                             | 0.09             |
| RS-22                                 | 5059-1-D-82-4, 58-93   | 35                   | 198.73                         | 1.53                             | 1.83                             | 0.16             |
| RS-23                                 | 5059-1-D-85-3, 50-81   | 31                   | 205.91                         | 1.9                              | 2.19                             | 0.13             |
| RS-24                                 | 5059-1-D-88-2, 37-75   | 38                   | 212.03                         | 1.55                             | 1.91                             | 0.19             |
| RS-25                                 | 5059-1-D-91-1, 6-42    | 36                   | 218.86                         | 1.6                              | 2.02                             | 0.21             |
| RS-26                                 | 5059-1-D-94-4, 35-70   | 35                   | 228.62                         | 1.44                             | 1.79                             | 0.19             |
| RS-27                                 | 5059-1-D-97-2, 63-98   | 35                   | 235.11                         | 2.19                             | 2.38                             | 0.08             |
| RS-28                                 | 5059-1-D-100-4, 30-65  | 35                   | 243.41                         | 2.13                             | 2.35                             | 0.09             |
| RS-29                                 | 5059-1-D-103-1, 5-41   | 36                   | 248.81                         | 1.91                             | 2.21                             | 0.14             |
| RS-30                                 | 5059-1-D-106-4, 3-40   | 37                   | 258.47                         | 1.69                             | 2.01                             | 0.16             |
| RS-31                                 | 5059-1-D-109-3, 37-76  | 39                   | 265.37                         | 1.63                             | 1.95                             | 0.16             |
| RS-32                                 | 5059-1-D-112-2, 0-37   | 37                   | 271.92                         | 2.05                             | 2.33                             | 0.12             |
| RS-33                                 | 5059-1-D-116-3, 30-64  | 34                   | 282.12                         | 2.48                             | 2.38                             | 0.04             |
| <i>Other SE-02b and SE-03 samples</i> |                        |                      |                                |                                  |                                  |                  |
| SG-24                                 | 5059-1C-54Z-2, 77-79   | 2                    | 153.23                         | 2.23                             | 1.98                             | 0.11             |
| SG-34                                 | 5059-1D-74Z-2, 78-82.5 | 3.5                  | 201.11                         | 2.24                             | 2.04                             | 0.09             |
| SG-35                                 | 5059-1D-76Z-3, 13-16   | 5                    | 206.85                         | 2.26                             | 2.05                             | 0.09             |
| SG-37                                 | 5059-1D-88Z-2, 33-37   | 4                    | 233.89                         | 1.94                             | 1.55                             | 0.20             |
| SG-38                                 | 5059-1D-91Z-1, 41.5-45 | 3.5                  | 241.78                         | 2.02                             | 1.62                             | 0.20             |
| SG-39                                 | 5059-1D-97Z-2, 60.5-64 | 3.5                  | 259.36                         | 2.36                             | 2.18                             | 0.08             |

Measurements follow ASTM C97-18, with volume computed from half- or whole-round core dimensions.

Measured by J. Fisher and M. D. Jackson

**Table S2. Bulk magnetic measurements, SE-02b and SE-03 reference samples**

| Reference Number                                                                                                                                                                                                                                                                                                                                                                                                                                                                                                                  | Specimen ID           | Specimen Length (cm) | Approx. Depth * (m) | Mass (g) | NRM (A/m) | X <sub>bulk</sub> (X <sub>LF</sub> ) (x10 <sup>-6</sup> SI) | X <sub>HF</sub> (x10 <sup>-6</sup> SI) | X <sub>FD</sub> (x10 <sup>-6</sup> SI) | X <sub>FD</sub> (%) |
|-----------------------------------------------------------------------------------------------------------------------------------------------------------------------------------------------------------------------------------------------------------------------------------------------------------------------------------------------------------------------------------------------------------------------------------------------------------------------------------------------------------------------------------|-----------------------|----------------------|---------------------|----------|-----------|-------------------------------------------------------------|----------------------------------------|----------------------------------------|---------------------|
| <i>SE-02B (Hole C)</i>                                                                                                                                                                                                                                                                                                                                                                                                                                                                                                            |                       |                      |                     |          |           |                                                             |                                        |                                        |                     |
| RS-1                                                                                                                                                                                                                                                                                                                                                                                                                                                                                                                              | 5059-1-C-4-2, 53-85   | 32                   | 22.66               | 17.576   | 0.20      | 666.8                                                       | 633.5                                  | 33.3                                   | 4.99                |
| RS-2                                                                                                                                                                                                                                                                                                                                                                                                                                                                                                                              | 5059-1-C-9-2, 58-88   | 30                   | 34.56               | 16.345   | 0.25      | 850.6                                                       | 797.6                                  | 53.0                                   | 6.23                |
| RS-3                                                                                                                                                                                                                                                                                                                                                                                                                                                                                                                              | 5059-1-C-13-2, 39-69  | 30                   | 44.44               | 17.781   | 0.38      | 1084.0                                                      | 1037.0                                 | 47.0                                   | 4.34                |
| RS-4                                                                                                                                                                                                                                                                                                                                                                                                                                                                                                                              | 5059-1-C-17-2, 68-98  | 30                   | 55.72               | 15.999   | 0.16      | 616.8                                                       | 580.5                                  | 36.3                                   | 5.89                |
| RS-5                                                                                                                                                                                                                                                                                                                                                                                                                                                                                                                              | 5059-1-C-22-2, 57-87  | 30                   | 65.11               | 17.004   | 0.15      | 642.8                                                       | 614.1                                  | 28.7                                   | 4.46                |
| RS-6                                                                                                                                                                                                                                                                                                                                                                                                                                                                                                                              | 5059-1-C-27-3, 51-81  | 30                   | 77.93               | 18.113   | 0.42      | 935.6                                                       | 899.8                                  | 35.8                                   | 3.83                |
| RS-7                                                                                                                                                                                                                                                                                                                                                                                                                                                                                                                              | 5059-1-C-30-2, 38-68  | 30                   | 86.20               | 15.425   | 0.43      | 791.4                                                       | 757.8                                  | 33.6                                   | 4.25                |
| RS-8                                                                                                                                                                                                                                                                                                                                                                                                                                                                                                                              | 5059-1-C-33-2, 61-91  | 30                   | 92.34               | 16.228   | 0.33      | 702.7                                                       | 670.4                                  | 32.3                                   | 4.60                |
| RS-9                                                                                                                                                                                                                                                                                                                                                                                                                                                                                                                              | 5059-1-C-36-2, 44-74  | 30                   | 100.84              | 16.728   | 0.36      | 674.2                                                       | 649.7                                  | 24.5                                   | 3.63                |
| RS-10                                                                                                                                                                                                                                                                                                                                                                                                                                                                                                                             | 5059-1-C-39-2, 68-98  | 30                   | 110.71              | 19.541   | 1.07      | 1296.0                                                      | 1246.0                                 | 50.0                                   | 3.86                |
| RS-11                                                                                                                                                                                                                                                                                                                                                                                                                                                                                                                             | 5059-1-C-42-3, 35-65  | 30                   | 120.33              | 20.236   | 1.22      | 1572.0                                                      | 1502.0                                 | 70.0                                   | 4.45                |
| RS-12                                                                                                                                                                                                                                                                                                                                                                                                                                                                                                                             | 5059-1-C-45-1, 38-68  | 30                   | 127.83              | 19.901   | 1.31      | 1528.0                                                      | 1496.0                                 | 32.0                                   | 2.09                |
| RS-13                                                                                                                                                                                                                                                                                                                                                                                                                                                                                                                             | 5059-1-C-49-3, 18-48  | 30                   | 138.17              | 17.178   | 0.86      | 1070.0                                                      | 1026.0                                 | 44.0                                   | 4.11                |
| RS-14                                                                                                                                                                                                                                                                                                                                                                                                                                                                                                                             | 5059-1-C-52-3, 60-89  | 29                   | 148.44              | 18.532   | 0.42      | 777.9                                                       | 734.3                                  | 43.6                                   | 5.60                |
| RS-15                                                                                                                                                                                                                                                                                                                                                                                                                                                                                                                             | 5059-1-C-55-3, 30-58  | 28                   | 157.01              | 18.810   | 2.99      | 1068.0                                                      | 1020.0                                 | 48.0                                   | 4.49                |
| RS-16                                                                                                                                                                                                                                                                                                                                                                                                                                                                                                                             | 5059-1-C-59-2, 35-65  | 30                   | 165.40              | 19.682   | 1.85      | 1093.0                                                      | 1052.0                                 | 41.0                                   | 3.75                |
| RS-17                                                                                                                                                                                                                                                                                                                                                                                                                                                                                                                             | 5059-1-C-62-3, 60-93  | 33                   | 175.98              | 17.843   | 1.55      | 1015.0                                                      | 980.4                                  | 34.6                                   | 3.41                |
| RS-18                                                                                                                                                                                                                                                                                                                                                                                                                                                                                                                             | 5059-1-C-65-2, 32-64  | 32                   | 180.65              | 16.531   | 0.57      | 668.8                                                       | 634.2                                  | 34.6                                   | 5.17                |
| <i>SE-03 (Hole D)</i>                                                                                                                                                                                                                                                                                                                                                                                                                                                                                                             |                       |                      |                     |          |           |                                                             |                                        |                                        |                     |
| RS-19                                                                                                                                                                                                                                                                                                                                                                                                                                                                                                                             | 5059-1-D-73-3, 34-68  | 34                   | 180.47              | 19.008   | 2.04      | 2265.0                                                      | 2204.0                                 | 61.0                                   | 2.69                |
| RS-20                                                                                                                                                                                                                                                                                                                                                                                                                                                                                                                             | 5059-1-D-74-2, 30-67  | 37                   | 181.07              | 18.638   | 1.49      | 1321.0                                                      | 1274.0                                 | 47.0                                   | 3.56                |
| RS-21                                                                                                                                                                                                                                                                                                                                                                                                                                                                                                                             | 5059-1-D-76-3, 20-55  | 35                   | 187.49              | 19.013   | 1.68      | 1486.0                                                      | 1428.0                                 | 58.0                                   | 3.90                |
| RS-22                                                                                                                                                                                                                                                                                                                                                                                                                                                                                                                             | 5059-1-D-82-4, 58-93  | 35                   | 198.73              | 18.262   | 1.06      | 1120.0                                                      | 1076.0                                 | 44.0                                   | 3.93                |
| RS-23                                                                                                                                                                                                                                                                                                                                                                                                                                                                                                                             | 5059-1-D-85-3, 50-81  | 31                   | 205.91              | 17.222   | 1.70      | 1440.0                                                      | 1392.0                                 | 48.0                                   | 3.33                |
| RS-24                                                                                                                                                                                                                                                                                                                                                                                                                                                                                                                             | 5059-1-D-88-2, 37-75  | 38                   | 212.03              | 15.126   | 1.29      | 990.8                                                       | 958.3                                  | 32.5                                   | 3.28                |
| RS-25                                                                                                                                                                                                                                                                                                                                                                                                                                                                                                                             | 5059-1-D-91-1, 6-42   | 36                   | 218.86              | 17.359   | 1.19      | 1221.0                                                      | 1169.0                                 | 52.0                                   | 4.26                |
| RS-26                                                                                                                                                                                                                                                                                                                                                                                                                                                                                                                             | 5059-1-D-94-4, 35-70  | 35                   | 228.62              | 14.879   | 0.80      | 855.5                                                       | 822.6                                  | 32.9                                   | 3.85                |
| RS-27                                                                                                                                                                                                                                                                                                                                                                                                                                                                                                                             | 5059-1-D-97-2, 63-98  | 35                   | 235.11              | 21.733   | 3.22      | 2260.0                                                      | 2116.0                                 | 144.0                                  | 6.37                |
| RS-28                                                                                                                                                                                                                                                                                                                                                                                                                                                                                                                             | 5059-1-D-100-4, 30-65 | 35                   | 243.41              | 20.421   | 1.96      | 1557.0                                                      | 1491.0                                 | 66.0                                   | 4.24                |
| RS-29                                                                                                                                                                                                                                                                                                                                                                                                                                                                                                                             | 5059-1-D-103-1, 5-41  | 36                   | 248.81              | 19.231   | 1.29      | 1145.0                                                      | 1100.0                                 | 45.0                                   | 3.93                |
| RS-30                                                                                                                                                                                                                                                                                                                                                                                                                                                                                                                             | 5059-1-D-106-4, 3-40  | 37                   | 258.47              | 18.170   | 1.46      | 1299.0                                                      | 1235.0                                 | 64.0                                   | 4.93                |
| RS-31                                                                                                                                                                                                                                                                                                                                                                                                                                                                                                                             | 5059-1-D-109-3, 37-76 | 39                   | 265.37              | 17.422   | 1.54      | 1200.0                                                      | 1166.0                                 | 34.0                                   | 2.83                |
| RS-32                                                                                                                                                                                                                                                                                                                                                                                                                                                                                                                             | 5059-1-D-112-2, 0-37  | 37                   | 271.92              | 19.723   | 3.04      | 1859.0                                                      | 1801.0                                 | 58.0                                   | 3.12                |
| RS-33                                                                                                                                                                                                                                                                                                                                                                                                                                                                                                                             | 5059-1-D-116-3, 30-64 | 34                   | 282.12              | 22.938   | 19.50     | 11590.0                                                     | 10870.0                                | 720.0                                  | 6.21                |
|                                                                                                                                                                                                                                                                                                                                                                                                                                                                                                                                   | 2016-1, Outcrop       |                      |                     | 13.506   | 0.17      | 601.4                                                       | 569.5                                  | 31.9                                   | 5.30                |
|                                                                                                                                                                                                                                                                                                                                                                                                                                                                                                                                   | 2016-2, Outcrop       |                      |                     | 13.709   | 0.18      | 633.8                                                       | 601.0                                  | 32.8                                   | 5.18                |
| <p>X<sub>LF</sub>, low-frequency magnetic susceptibility (measured in a 200 A/m field at 976 Hz); X<sub>HF</sub>, high-frequency magnetic susceptibility (measured in a 200 A/m field at 15,616 Hz); X<sub>FD</sub>, frequency-dependent magnetic susceptibility (X<sub>LF</sub>-X<sub>HF</sub> or 100*(X<sub>FD</sub>/X<sub>LF</sub>) for %). All reported magnetic susceptibilities are the mean of triplicate measurements of 7 cc sample cubes of known mass made using an AGICO MFK1 kappabridge.</p> <p>* Top of sample</p> |                       |                      |                     |          |           |                                                             |                                        |                                        |                     |

Measured by J. M. Marquardt and P. C. Lippert

**Table S3. XRF Major Element Analyses of Surtsey Drill Core Samples**

| Sample                                                                                       | IINH ID  | ICDP Box Number | Section Number | Interval (cm) | Approx. Depth (m) | Rock Type | SiO2 wt % | TiO2 wt % |
|----------------------------------------------------------------------------------------------|----------|-----------------|----------------|---------------|-------------------|-----------|-----------|-----------|
| <b>Surface Samples</b>                                                                       |          |                 |                |               |                   |           |           |           |
| 16-01                                                                                        |          |                 |                |               | 0.0               | Tuff      | 46.98     | 2.30      |
| 16-02                                                                                        |          |                 |                |               | 0.0               | Tuff      | 47.14     | 2.32      |
| 16-03                                                                                        |          |                 |                |               | 0.0               | Lava Flow | 46.62     | 2.16      |
| <b>1979 Core (SE-01)</b>                                                                     |          |                 |                |               |                   |           |           |           |
| SA 14.2                                                                                      | NI 30137 |                 |                |               | 14.2              | Tuff      | 46.53     | 2.33      |
| SA 25.4                                                                                      | NI 30138 |                 |                |               | 25.4              | Tuff      | 46.46     | 2.37      |
| SA 37.3                                                                                      | NI 30139 |                 |                |               | 37.3              | Tuff      | 46.76     | 2.35      |
| SA 65.6                                                                                      | NI 30140 |                 |                |               | 65.6              | Tuff      | 46.52     | 2.28      |
| SA 70.7                                                                                      | NI 30141 |                 |                |               | 70.7              | Tuff      | 46.44     | 2.29      |
| SA 125.5                                                                                     | NI 30142 |                 |                |               | 125.5             | Tuff      | 45.96     | 2.33      |
| SA 145                                                                                       | NI 30143 |                 |                |               | 145               | Tuff      | 46.25     | 2.47      |
| SA 157.1                                                                                     | NI 30144 |                 |                |               | 157.1             | Tuff      | 46.58     | 2.51      |
| SA 170                                                                                       | NI 30145 |                 |                |               | 170.0             | Tuff      | 43.81     | 2.37      |
| SE-1-170                                                                                     |          |                 |                |               | 171.0             | Tephra    | 45.90     | 2.48      |
| <b>2017 Core (SE-02B, Hole C)</b>                                                            |          |                 |                |               |                   |           |           |           |
| RS-1-4                                                                                       |          | 4               | 2              | 53-85         | 22.7              | Tuff      | 45.80     | 2.33      |
| RS-2-4                                                                                       |          | 9               | 2              | 58-88         | 34.7              | Tuff      | 45.93     | 2.32      |
| RS-3-4                                                                                       |          | 13              | 2              | 39-69         | 43.6              | Tuff      | 45.72     | 2.27      |
| RS-4-4                                                                                       |          | 17              | 2              | 68-98         | 55.9              | Tuff      | 45.81     | 2.29      |
| RS-5-4                                                                                       |          | 22              | 2              | 57-87         | 65.3              | Tuff      | 45.68     | 2.23      |
| RS-6-4                                                                                       |          | 27              | 3              | 51-81         | 78.1              | Tuff      | 45.98     | 2.20      |
| RS-7-4                                                                                       |          | 30              | 2              | 38-68         | 86.3              | Tuff      | 45.85     | 2.23      |
| RS-8-4                                                                                       |          | 33              | 2              | 61-91         | 92.5              | Tuff      | 45.73     | 2.21      |
| RS-9-4                                                                                       |          | 36              | 2              | 44-74         | 101.3             | Tuff      | 46.00     | 2.23      |
| RS-10-4                                                                                      |          | 39              | 2              | 68-96         | 110.9             | Tuff      | 45.66     | 2.28      |
| RS-11-4                                                                                      |          | 42              | 3              | 35-65         | 120.5             | Tuff      | 45.65     | 2.29      |
| RS-12-4                                                                                      |          | 45              | 1              | 38-68         | 127.9             | Tuff      | 45.76     | 2.31      |
| RS-13-4                                                                                      |          | 49              | 3              | 17-48         | 138.3             | Tuff      | 45.72     | 2.31      |
| RS-14-4                                                                                      |          | 52              | 3              | 60-89         | 148.6             | Tuff      | 45.62     | 2.40      |
| RS-15-4                                                                                      |          | 55              | 3              | 30-58         | 157.1             | Tuff      | 45.36     | 2.43      |
| RS-16-4                                                                                      |          | 59              | 2              | 35-65         | 165.6             | Tuff      | 45.45     | 2.50      |
| RS-17-4                                                                                      |          | 62              | 3              | 60-93         | 176.1             | Tuff      | 45.52     | 2.55      |
| RS-18-4                                                                                      |          | 65              | 2              | 32-64         | 180.8             | Tuff      | 45.44     | 2.54      |
| BIR-1                                                                                        |          |                 |                |               |                   |           | 47.39     | 0.93      |
| BIR-1 (USGS preferred value)                                                                 |          |                 |                |               |                   |           | 47.96     | 0.96      |
| Fe2O3* is total Fe as Fe2O3 following ignition of the sample at 1020 degrees C for > 2 hours |          |                 |                |               |                   |           |           |           |
| LOI is loss in weight following ignition of the sample at 1020 degrees C for > 2 hours       |          |                 |                |               |                   |           |           |           |
| XRF methods are those of Rhodes and Vollinger (2004)                                         |          |                 |                |               |                   |           |           |           |

| Al2O3<br>wt % | Fe2O3*<br>wt % | MnO<br>wt % | MgO<br>wt % | CaO<br>wt % | Na2O<br>wt % | K2O<br>wt % | P2O5<br>wt % | SO3<br>wt % | Total<br>wt % | LOI<br>wt % |
|---------------|----------------|-------------|-------------|-------------|--------------|-------------|--------------|-------------|---------------|-------------|
| 16.03         | 13.59          | 0.21        | 7.93        | 9.04        | 3.07         | 0.59        | 0.33         | 0.01        | 100.08        | 8.40        |
| 16.03         | 13.64          | 0.22        | 7.79        | 8.09        | 3.81         | 0.78        | 0.34         | 0.03        | 100.19        | 6.81        |
| 15.65         | 13.25          | 0.21        | 8.33        | 10.01       | 3.15         | 0.52        | 0.30         | 0.04        | 100.24        | -0.28       |
| 16.17         | 13.44          | 0.21        | 7.23        | 9.15        | 3.59         | 0.63        | 0.35         | 0.13        | 99.76         | 8.49        |
| 16.24         | 13.54          | 0.22        | 7.27        | 9.26        | 3.52         | 0.65        | 0.36         | 0.47        | 100.36        | 7.68        |
| 16.39         | 13.38          | 0.21        | 7.04        | 9.07        | 3.94         | 0.58        | 0.36         | 0.15        | 100.23        | 3.35        |
| 16.28         | 13.24          | 0.21        | 7.24        | 8.98        | 4.29         | 0.61        | 0.35         | 0.21        | 100.21        | 8.90        |
| 16.25         | 13.18          | 0.21        | 7.07        | 9.41        | 3.85         | 0.64        | 0.35         | 0.28        | 99.97         | 7.77        |
| 16.16         | 13.62          | 0.22        | 6.75        | 9.38        | 4.22         | 0.78        | 0.35         | 0.40        | 100.16        | 8.32        |
| 16.26         | 13.79          | 0.22        | 6.57        | 9.22        | 3.96         | 0.61        | 0.35         | 0.29        | 99.99         | 7.81        |
| 16.33         | 14.07          | 0.24        | 8.93        | 4.86        | 5.30         | 0.26        | 0.36         | 0.41        | 99.84         | 6.90        |
| 15.45         | 13.27          | 0.21        | 6.65        | 10.64       | 3.31         | 0.59        | 0.35         | 3.65        | 100.30        | 0.42        |
| 15.78         | 14.56          | 0.22        | 7.93        | 8.54        | 3.73         | 0.62        | 0.34         | 0.15        | 100.26        | -0.12       |
| 16.32         | 13.55          | 0.21        | 7.16        | 9.48        | 3.38         | 0.66        | 0.36         | n.d.        | 99.25         | 11.91       |
| 16.42         | 13.35          | 0.20        | 7.07        | 9.07        | 4.12         | 0.61        | 0.36         | n.d.        | 99.45         | 9.97        |
| 16.31         | 13.24          | 0.20        | 7.20        | 9.34        | 3.75         | 0.79        | 0.37         | n.d.        | 99.21         | 10.18       |
| 16.34         | 13.24          | 0.20        | 7.05        | 9.28        | 4.27         | 0.64        | 0.38         | n.d.        | 99.50         | 11.39       |
| 16.18         | 13.10          | 0.20        | 7.00        | 9.21        | 5.58         | 0.64        | 0.37         | n.d.        | 100.18        | 13.01       |
| 16.50         | 12.91          | 0.20        | 6.98        | 8.96        | 4.69         | 0.49        | 0.36         | n.d.        | 99.27         | 10.97       |
| 16.30         | 13.01          | 0.20        | 7.00        | 9.16        | 4.51         | 0.65        | 0.37         | n.d.        | 99.27         | 10.46       |
| 16.34         | 12.90          | 0.20        | 6.86        | 9.42        | 4.75         | 0.78        | 0.36         | n.d.        | 99.56         | 10.62       |
| 16.49         | 12.95          | 0.20        | 7.13        | 8.91        | 5.06         | 0.44        | 0.36         | n.d.        | 99.77         | 10.66       |
| 16.41         | 13.14          | 0.20        | 6.94        | 9.09        | 4.53         | 0.64        | 0.37         | n.d.        | 99.27         | 10.99       |
| 16.33         | 13.18          | 0.20        | 7.01        | 9.52        | 4.33         | 0.71        | 0.36         | n.d.        | 99.58         | 10.00       |
| 16.37         | 13.28          | 0.20        | 6.84        | 8.79        | 4.72         | 0.54        | 0.36         | n.d.        | 99.18         | 9.72        |
| 16.39         | 13.29          | 0.20        | 6.70        | 8.23        | 5.84         | 0.30        | 0.36         | n.d.        | 99.34         | 9.96        |
| 16.41         | 13.63          | 0.21        | 6.75        | 9.10        | 4.45         | 0.56        | 0.38         | n.d.        | 99.50         | 10.68       |
| 16.41         | 13.61          | 0.21        | 6.47        | 9.14        | 4.48         | 0.62        | 0.39         | n.d.        | 99.12         | 10.61       |
| 16.35         | 13.95          | 0.21        | 6.47        | 8.95        | 4.34         | 0.69        | 0.38         | n.d.        | 99.29         | 10.45       |
| 16.44         | 14.09          | 0.21        | 6.43        | 8.45        | 4.92         | 0.62        | 0.39         | n.d.        | 99.63         | 10.00       |
| 16.45         | 14.16          | 0.22        | 6.90        | 8.52        | 3.64         | 0.67        | 0.39         | n.d.        | 98.93         | 1.15        |
| 15.82         | 11.36          | 0.18        | 9.59        | 13.3        | 1.87         | 0.03        | 0.02         | n.d.        | 100.46        | n.d.        |
| 15.5          | 11.3           | 0.17        | 9.7         | 13.3        | 1.82         | 0.03        | 0.02         | n.d.        | 100.76        | n.d.        |
